# Supplementary material
Source: PubMed Central journal article supplement (PMC9886717)

**Supplemental File**

**Supp. Figure 1.** Western blot image of AT<sub>1</sub>R protein

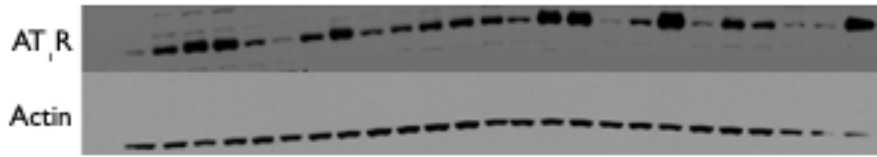

**Supp. Figure 2.** Western blot image of AT<sub>2</sub>R protein

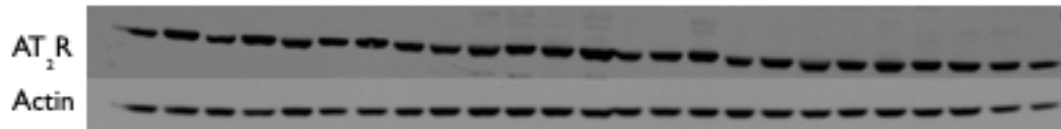

**Supp. Figure 3.** Western blot image of AT<sub>4</sub>R protein

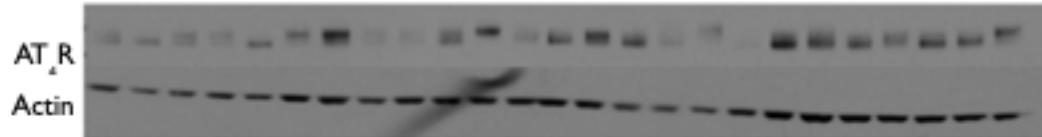

Supplement: 11357_2022_639_MOESM1_ESM.pdf [file 11357_2022_639_MOESM1_ESM.pdf]
